# Supplementary material for: Gold-assisted E′ centres formation on the silica surface of Au/SBA-15 catalysts for low temperature CO oxidation
Source: Royal Society of Chemistry journal article supplement (doi:10.1039/c2cp40380c), 2012-01-01
Supplement: c2cp40380c.pdf [file c2cp40380c.pdf]

## Gold-assisted E' centres formation on the silica surface of Au/SBA-15 catalysts for low temperature CO oxidation

E. Rombi<sup>a,\*</sup>, M. G. Cutrufello<sup>a</sup>, C. Cannas<sup>a</sup>, M. Occhiuzzi<sup>b</sup>, B. Onida<sup>c</sup>, and I. Ferino<sup>a</sup>

<sup>a</sup>*Università di Cagliari, Dipartimento di Scienze Chimiche, Complesso Universitario Monserrato, S. S. 554 Bivio Sestu, 09042 Monserrato (CA), Italy*

<sup>b</sup>*Università di Roma "La Sapienza", Dipartimento di Chimica, Piazzale Aldo Moro 5, 00185 Roma, Italy*

<sup>c</sup>*Politecnico di Torino, Dipartimento di Scienza dei Materiali e Ingegneria Chimica, CR-INSTM for Materials with Controlled Porosity, Via Duca degli Abruzzi 24, 10129 Torino, Italy*

### Electronic Supplementary Information

Solid state NMR spectroscopy of <sup>29</sup>Si and <sup>13</sup>C was used (in addition to CHS analysis) to check the effective incorporation of MPTMS onto the walls of SBA-15, as well as to investigate the interactions between gold and the mercaptopropyl groups. The pertinent results are reported in Fig. S1. Besides the three partially overlapping signals in the region from -80 to -120 ppm, ascribable to Q<sup>2</sup> (-92 ppm), Q<sup>3</sup> (-100 ppm), and Q<sup>4</sup> (-110 ppm) silicon atoms,<sup>S1</sup> the SBA-15-SH functionalized support (Fig. S1a) shows the two low-field signals T<sup>2</sup> (-56 ppm) and T<sup>3</sup> (-66 ppm) typical of the silane organic moieties incorporated as a part of the

---

\* corresponding author: tel. +390706754419; fax +390706754388; e-mail rombi@unica.it

silica walls structure.<sup>S2,S3</sup> The successful incorporation of the mercaptopropyl groups onto the mesopore surface is also confirmed by the  $^{13}\text{C}$  CPMAS NMR analysis. In the SBA-15-SH spectrum (Fig. S1b) the peak at 10.7 ppm can be attributed to the methylene carbon atom directly bonded to the silicon atom (C1); the other two methylene carbon atoms (C2 and C3) are responsible for the strong signal at 27.0 ppm. Although the ratio between the intensities of the T and the Q signals does not change significantly after addition of gold, the  $^{29}\text{Si}$  MAS spectrum of the Au/SBA-15-SH sample shows some rearrangement in the distribution of the Si atoms within the Q and T sites, which seems to depend on the reducing treatment rather than on the gold presence itself.<sup>S4</sup> A more complicated pattern is obtained for the Au/SBA-15-SH catalyst when submitted to the  $^{13}\text{C}$  CPMAS NMR analysis. New signals (at 17.5 ppm, 22.1 ppm, 28.9 ppm, and a very broad asymmetric one at *ca.* 40 ppm) are observed, which might be originated by the C3 and C2 methylene carbon atoms of the propylic chains:<sup>S4</sup> (i), in the presence of S–Au interactions (*ca.* 40 ppm); (ii), in the presence of disulfide species (22.1 ppm); and (iii), as a consequence of some perturbation of the  $-(\text{CH}_2)_3\text{-SH}$  groups (17.5 ppm and 28.9 ppm), induced by the presence of gold.

The Raman spectrum of the as-made Au/SBA-15-SH catalyst (not shown) exhibited the stretching ( $2800\text{-}2900\text{ cm}^{-1}$ ) and bending vibrations ( $1250\text{-}1500\text{ cm}^{-1}$ ) of the  $-\text{CH}_2$  methylene groups as well as the stretching frequency of the C–S bond ( $650\text{ cm}^{-1}$ ).<sup>S5</sup> This result further confirms the successful functionalization of SBA-15 by MPTMS. The stretching bands of both S–Au<sup>S6</sup> and S–H<sup>S7</sup> bonds were also observed at  $300\text{ cm}^{-1}$  and  $2580\text{ cm}^{-1}$ , respectively, indicating that only a fraction of the  $-\text{SH}$  groups are involved in the formation of S–Au bonding. In agreement with the  $^{13}\text{C}$  NMR results, an additional band at *ca.*  $500\text{ cm}^{-1}$ , ascribable to the S–S stretching mode, was detected as well, revealing the presence of disulfide species formed by reaction between adjacent thiol groups.<sup>S6</sup>

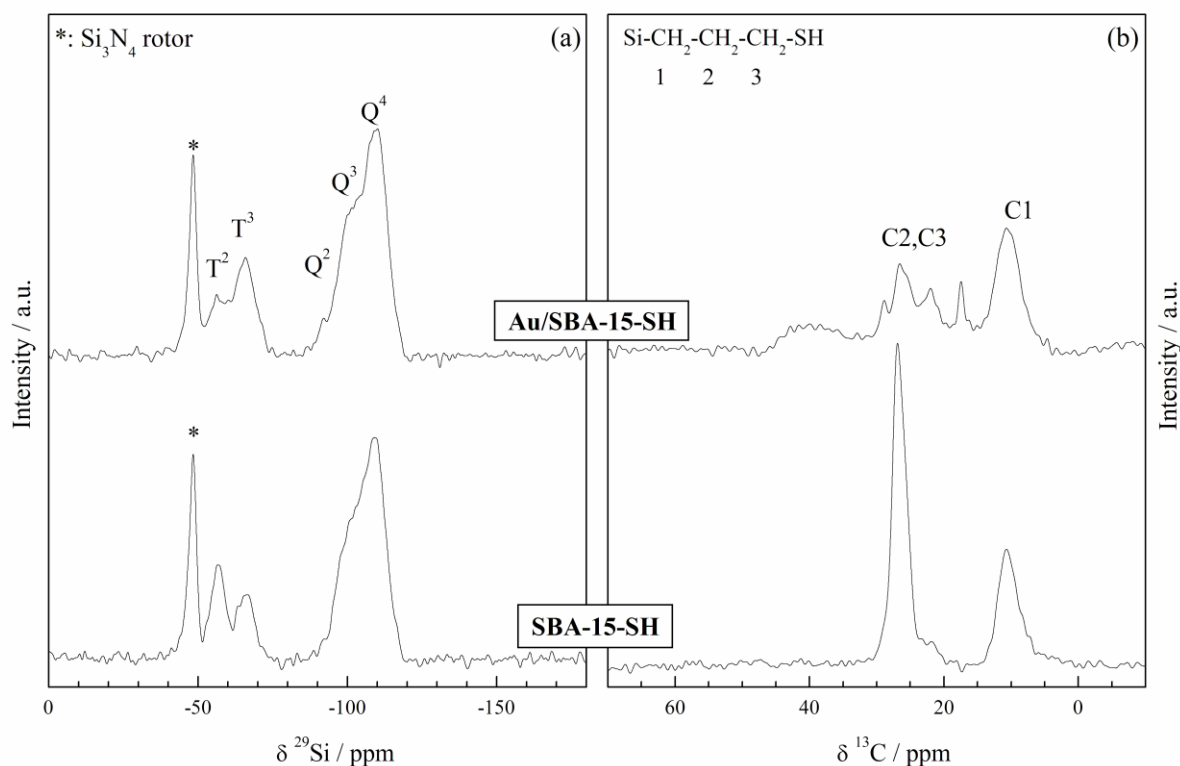

**Figure S1.** Solid state  $^{29}\text{Si}$  MAS (a) and  $^{13}\text{C}$  CPMAS (b) NMR spectra.

The low-angle X-ray diffraction (LA-XRD) patterns of both the bare and the functionalized supports as well as of the as-made catalyst are reported in Fig. S2. The SBA-15 sample shows the well-resolved (100), (110), and (200) diffraction peaks typical of the 2-D hexagonal mesostructure (P6mm space group) of the pore system. The LA-XRD pattern of the SBA-15-SH sample is similar to that of the parent SBA-15, though the weak (110) and (200) diffraction peaks are less intense, indicating a less ordered system. A slight shift of the reflections towards lower angles is observed, in agreement with previous results on similar systems.<sup>S8</sup> The corresponding slight increase in the lattice constant (of *ca.* 0.15 nm) indicates that changes in the pore size and/or the wall thickness have occurred as a consequence of the functionalization process. No changes in the LA-XRD pattern of the gold-containing sample are observed.

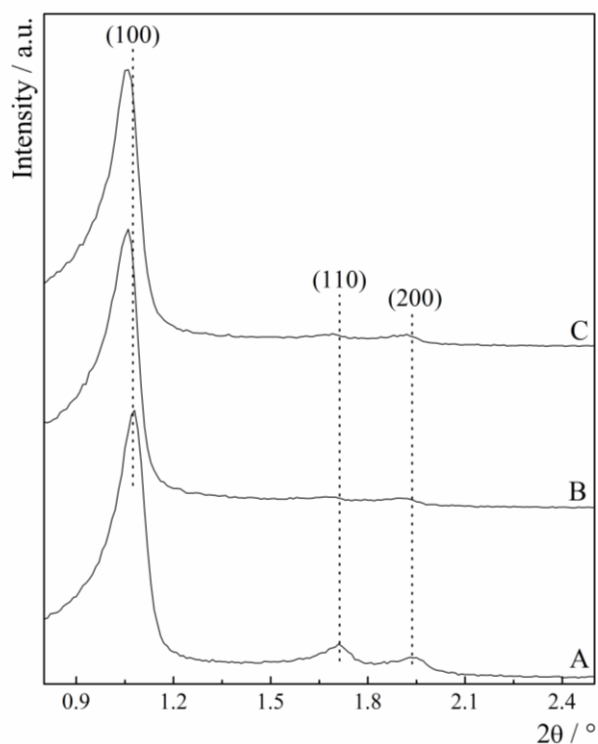

**Figure S2.** Low-angle X-ray Diffraction patterns of SBA-15 (A), SBA-15-SH (B), and Au/SBA-15-SH (C).

## References

- S1. E. Lipmaa, M. Magi, A. Samson, G. Engelhardt, A. R. Grimmer, *J. Am. Chem. Soc.*, 1980, 102, 4889-4893.
- S2. M. Llusar, G. Monros, C. Roux, J. L. Pozzo, C. Sanchez, *J. Mater. Chem.*, 2003, 13, 2505-2514.
- S3. Y. Q. Wang, C. M. Yang, B. Zibrowius, B. Spliethoff, M. Linden, F. Schüth, *Chem. Mater.*, 2003, 15, 5029-5035.

- S4. M. G. Cutrufello, E. Rombi, C. Cannas, M. Casu, B. Onida, S. Fiorilli, I. Ferino, in *Topics in Chemistry and Material Science*, ed. K. Hadjiivanov, V. Valtchev, S. Mintova and G. Vayssilov, Heron Press, Sofia, 2010, vol. 4, pp. 222-232.
- S5. G. Socrates, in *Infrared and Raman Characteristic Group Frequencies – Tables and Charts*, John Wiley & Sons, Chichester, 3rd edn., 2001.
- S6. G. J. Kluth, C. Carraro, and R. Maboudian, *Phys. Rev. B*, 1999, 59, R10449-R10452.
- S7. S. W. Raso, P. L. Clark, C. Haase-Pettingell, J. King, and G. J. Thomas, Jr., *J. Mol. Biol.*, 2001, 307, 899-911.
- S8. M. G. Cutrufello, E. Rombi, C. Cannas, M. Casu, A. Virga, S. Fiorilli, B. Onida, I. Ferino, *J. Mater. Sci.*, 2009, **44**, 6644-6653.
